# Supplementary material for: Development of Poly(vinyl alcohol) Grafted Glycidyl Methacrylate/Cellulose Nanofiber Injectable Hydrogels for Meniscus Tissue Engineering
Source: MDPI journal article supplement (doi:10.3390/polym15214230), 2023-10-26
Supplement: s1 [file s1]

# Supplementary Information

## Development of Poly (vinyl alcohol) Grafted Glycidyl Methacrylate/Cellulose Nanofiber Injectable Hydrogels for Meniscus Tissue Engineering

**Jiraporn Sinna<sup>1,2</sup>, Rachasit Jeencham<sup>1</sup>, Priyapat Mueangkhhot<sup>2</sup>, Sorasak Sophon<sup>2</sup>, Pornpattara Noralak<sup>2</sup>, Romtira Raksapakdee<sup>2</sup>, Piya-on Numpaisal<sup>1,3,\*</sup> and Yupaporn Ruksakulpiwat<sup>1,2,\*</sup>**

<sup>1</sup> Research Center for Biocomposite Materials for Medical Industry and Agricultural and Food Industry,  
Nakhon Ratchasima 30000, Thailand

<sup>2</sup> School of Polymer Engineering, Institute of Engineering, Suranaree University of Technology,  
Nakhon Ratchasima 30000, Thailand

<sup>3</sup> School of Orthopaedics, Institute of Medicine, Suranaree University of Technology,  
Nakhon Ratchasima 30000, Thailand

\* Correspondence: piya-on@sut.ac.th (P.-o.N.); yupa@sut.ac.th (Y.R.)

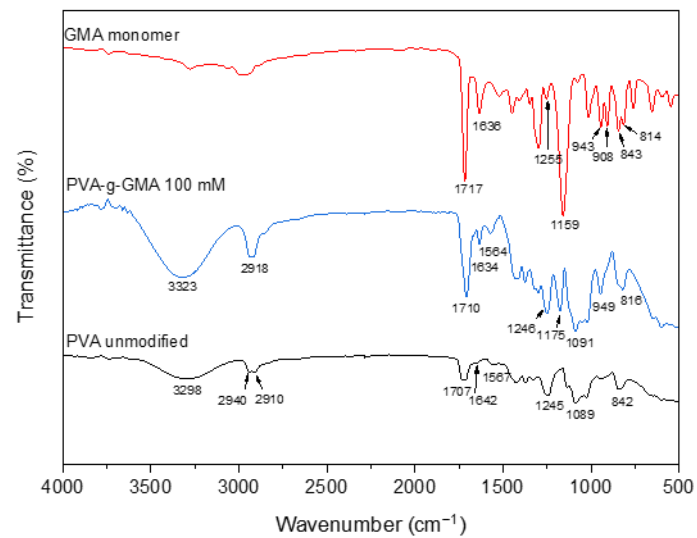

**Figure S1.** Comparison of the FTIR spectra of GMA monomer, PVA-g-GMA 100 mM, and PVA unmodified.

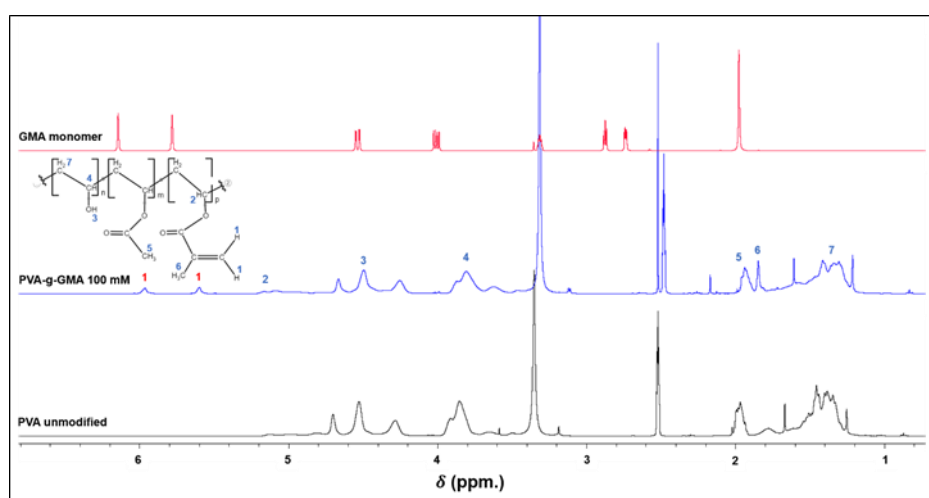

**Figure S2.** The  $^1\text{H}$  NMR spectra of GMA monomer, PVA-g-GMA 100 mM, and PVA unmodified.

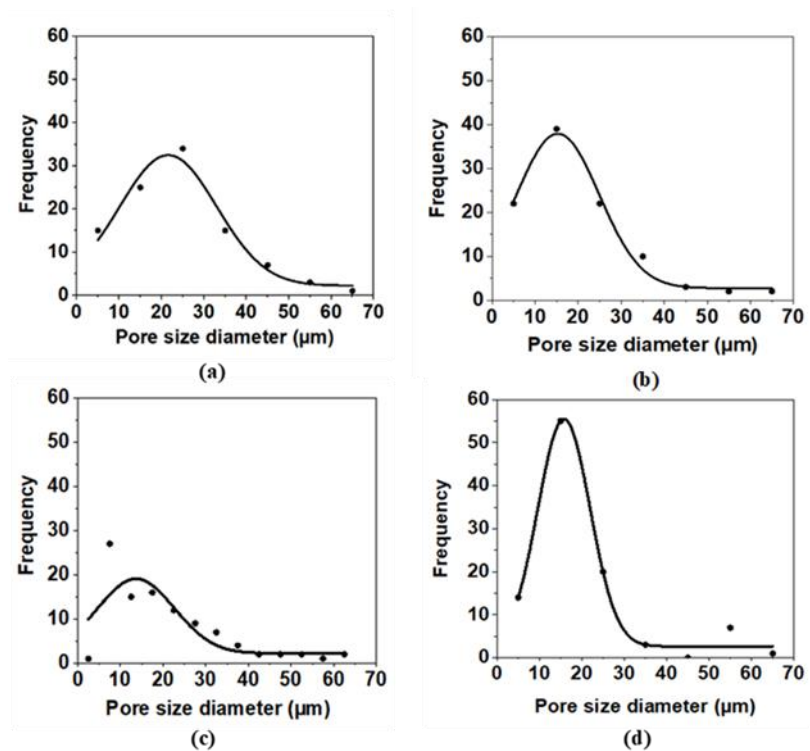

**Figure S3.** Pore size diameter distribution of (a) 10%PVA-g-GMA, (b) 10%PVA-g-GMA/0.3%CNF, (c) 10%PVA-g-GMA/0.5%CNF, (d) 10%PVA-g-GMA/0.7%CNF injectable hydrogel.
